# Supplementary material for: Genetic and epigenetic variation among inbred mouse littermates: identification of inter-individual differentially methylated regions
Source: PubMed Central journal article supplement (PMC4676890; doi:10.1186/s13072-015-0047-z), 2015-12-12

**a** iiDMR 61 Chr12:74938676-74939466

|                                  | Yellow | Pseudo-agouti | C57.1 | C57.2 | C57.3 |
|----------------------------------|--------|---------------|-------|-------|-------|
| WGBS liver DNA methylation level | 0.301  | 0.363         | 0.749 | 0.414 | 0.476 |

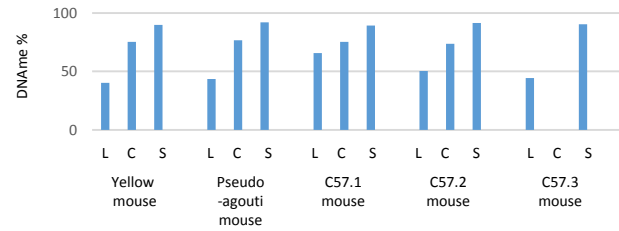

**b** iiDMR 218 Chr14:65945143-65945307

|                                  | Yellow | Pseudo-agouti | C57.1 | C57.2 | C57.3 |
|----------------------------------|--------|---------------|-------|-------|-------|
| WGBS liver DNA methylation level | 0.575  | 0.494         | 0.455 | 0.414 | 0.691 |

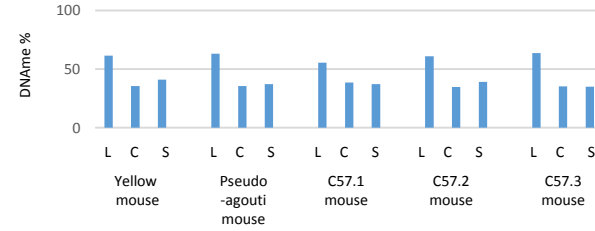

**c** iiDMR 208 Chr2:103296517-103296617

|                                  | Yellow | Pseudo-agouti | C57.1 | C57.2 | C57.3 |
|----------------------------------|--------|---------------|-------|-------|-------|
| WGBS liver DNA methylation level | 0.547  | 0.687         | 0.843 | 0.564 | 0.685 |

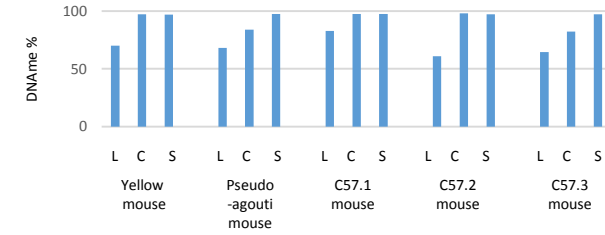

**d** iiDMR 200 Chr3:109675078-109675127

|                                  | Yellow | Pseudo-agouti | C57.1 | C57.2 | C57.3 |
|----------------------------------|--------|---------------|-------|-------|-------|
| WGBS liver DNA methylation level | 0.5    | 0.529         | 0.649 | 0.495 | 0.366 |

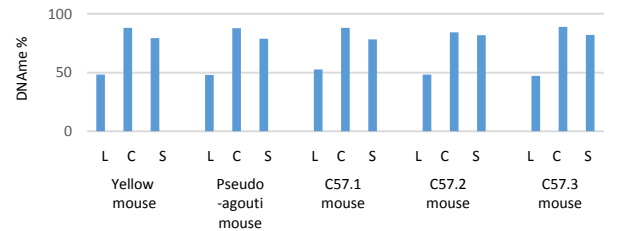

**e** iiDMR 49 Chr3:122184640-122184732

|                                  | Yellow | Pseudo-agouti | C57.1 | C57.2 | C57.3 |
|----------------------------------|--------|---------------|-------|-------|-------|
| WGBS liver DNA methylation level | 0.32   | 0.304         | 0.383 | 0.482 | 0.085 |

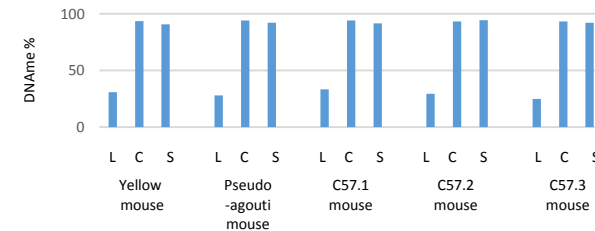

**f** iiDMR 38 Chr7:20538079-20538160

|                                  | Yellow | Pseudo-agouti | C57.1 | C57.2 | C57.3 |
|----------------------------------|--------|---------------|-------|-------|-------|
| WGBS liver DNA methylation level | 0.129  | 0.038         | 0.257 | 0.447 | 0.054 |

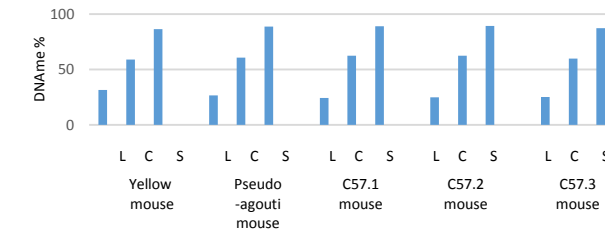

**g** iiDMR 10 Chr7:53995436-53995840

|                                  | Yellow | Pseudo-agouti | C57.1 | C57.2 | C57.3 |
|----------------------------------|--------|---------------|-------|-------|-------|
| WGBS liver DNA methylation level | 0.843  | 0.414         | 0.824 | 0.91  | 0.507 |

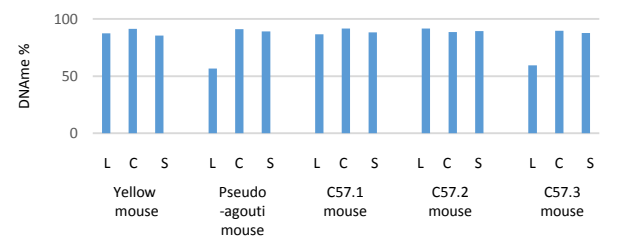

**h** iiDMR 230 Chr8:124167463-124167786

|                                  | Yellow | Pseudo-agouti | C57.1 | C57.2 | C57.3 |
|----------------------------------|--------|---------------|-------|-------|-------|
| WGBS liver DNA methylation level | 0.092  | 0.061         | 0.33  | 0.1   | 0.116 |

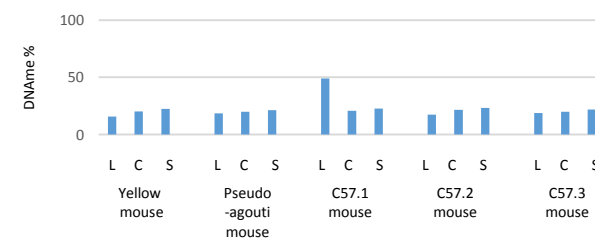

**i** iiDMR 191 chr16:87512879-87512967

|                                  | Yellow | Pseudo-agouti | C57.1 | C57.2 | C57.3 |
|----------------------------------|--------|---------------|-------|-------|-------|
| WGBS liver DNA methylation level | 0.744  | 0.596         | 0.849 | 0.882 | 0.691 |

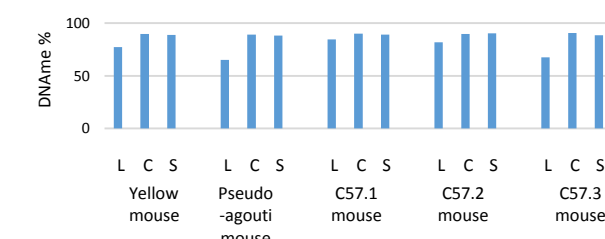

Supplement: 13072_2015_47_MOESM6_ESM.pdf [file 13072_2015_47_MOESM6_ESM.pdf]
