# Supplementary material for: Genetic and epigenetic variation among inbred mouse littermates: identification of inter-individual differentially methylated regions
Source: PubMed Central journal article supplement (PMC4676890; doi:10.1186/s13072-015-0047-z), 2015-12-12
Supplement: 13072_2015_47_MOESM3_ESM.pdf [file 13072_2015_47_MOESM3_ESM.pdf]

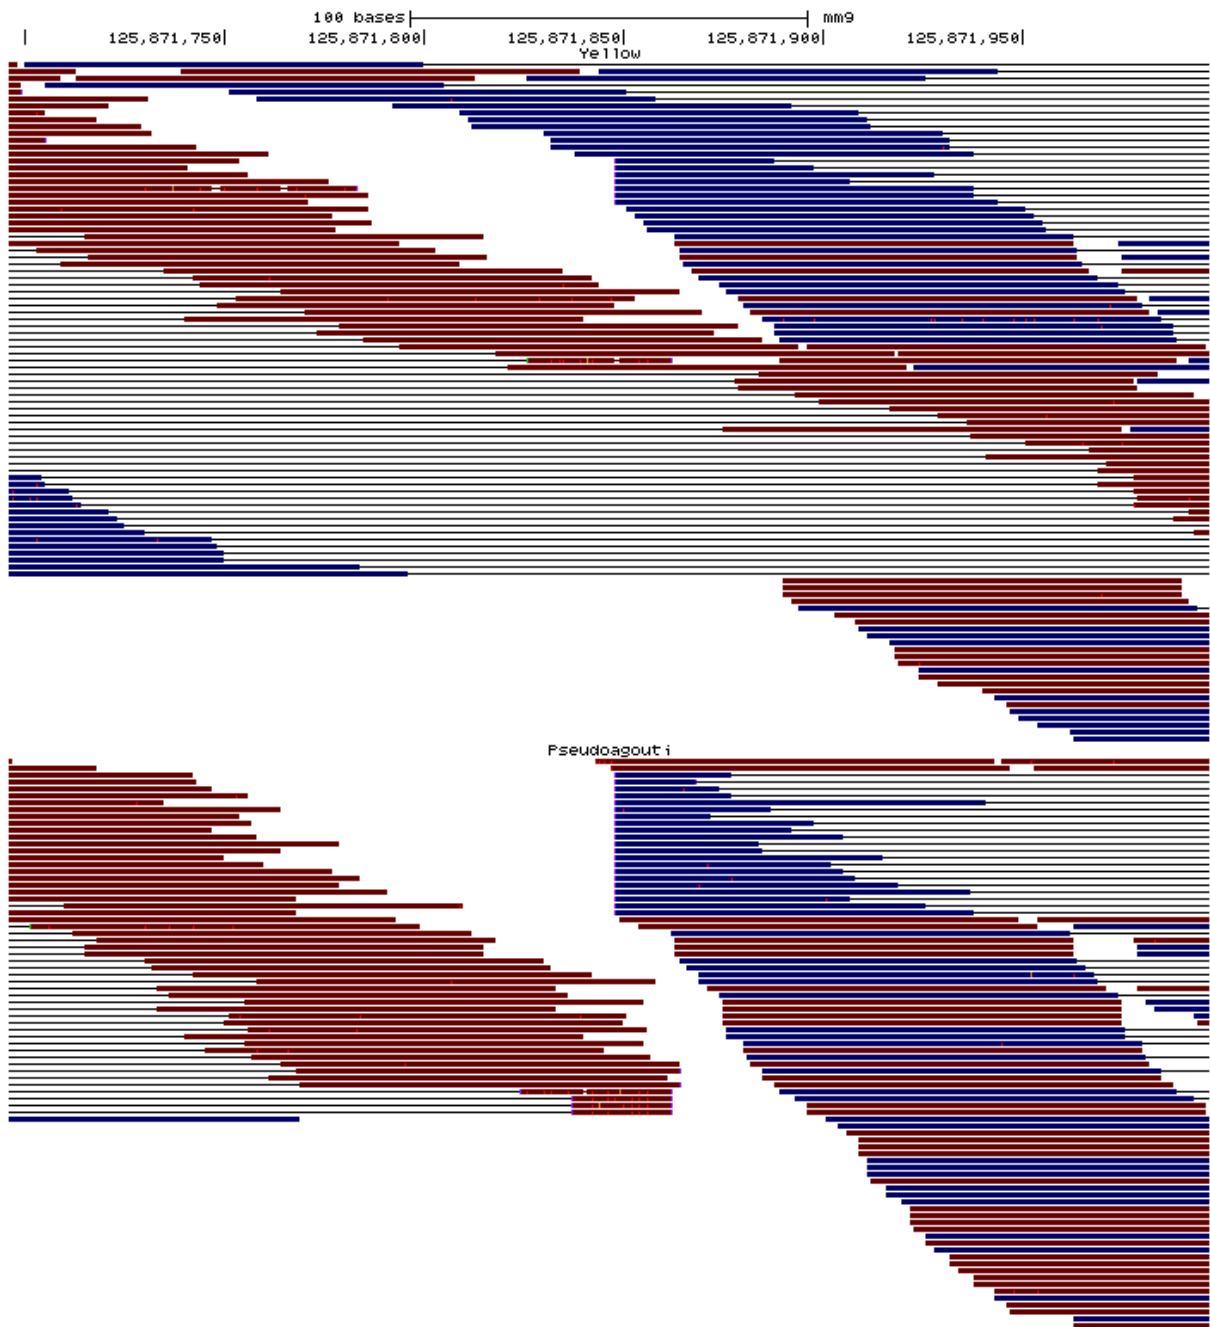

chr1:125,871,697-125,871,997

- L1 insertion
- Yellow mouse heterozygous, pseudoagouti mouse homozygous

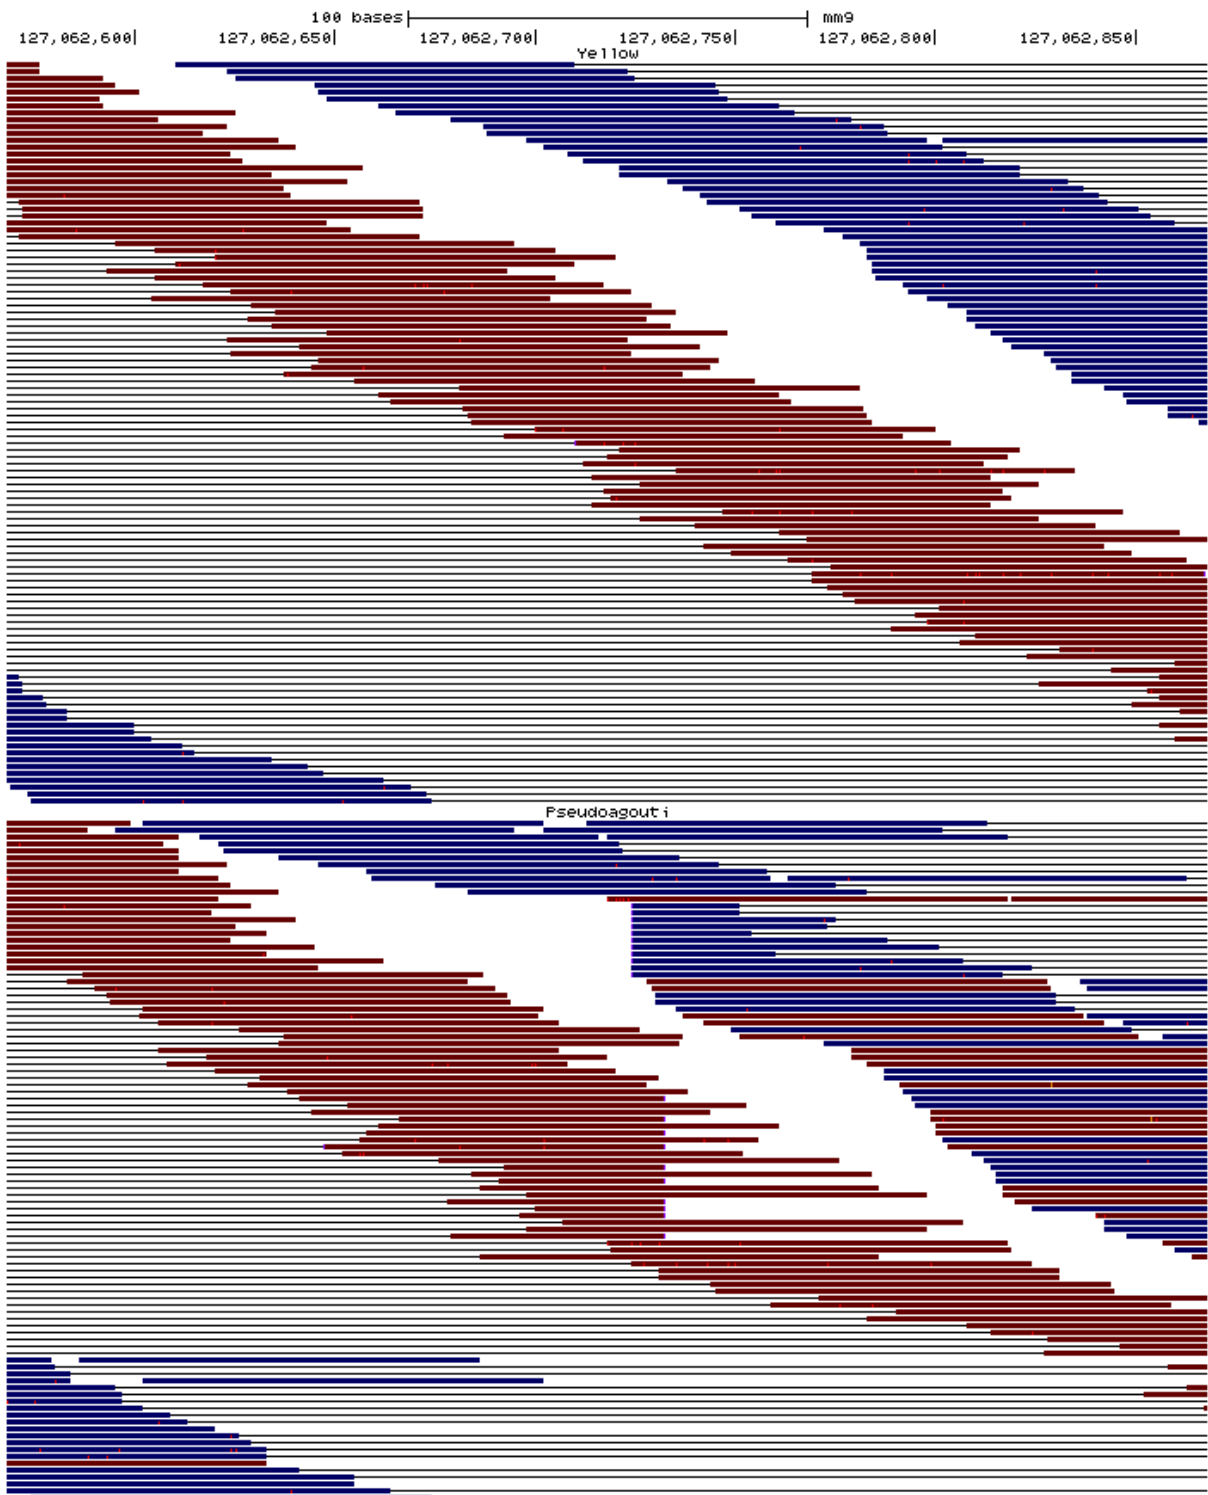

chr1:127,062,569-127,062,868

- MT2 insertion
- Yellow mouse wildtype, pseudoagouti mouse heterozygous

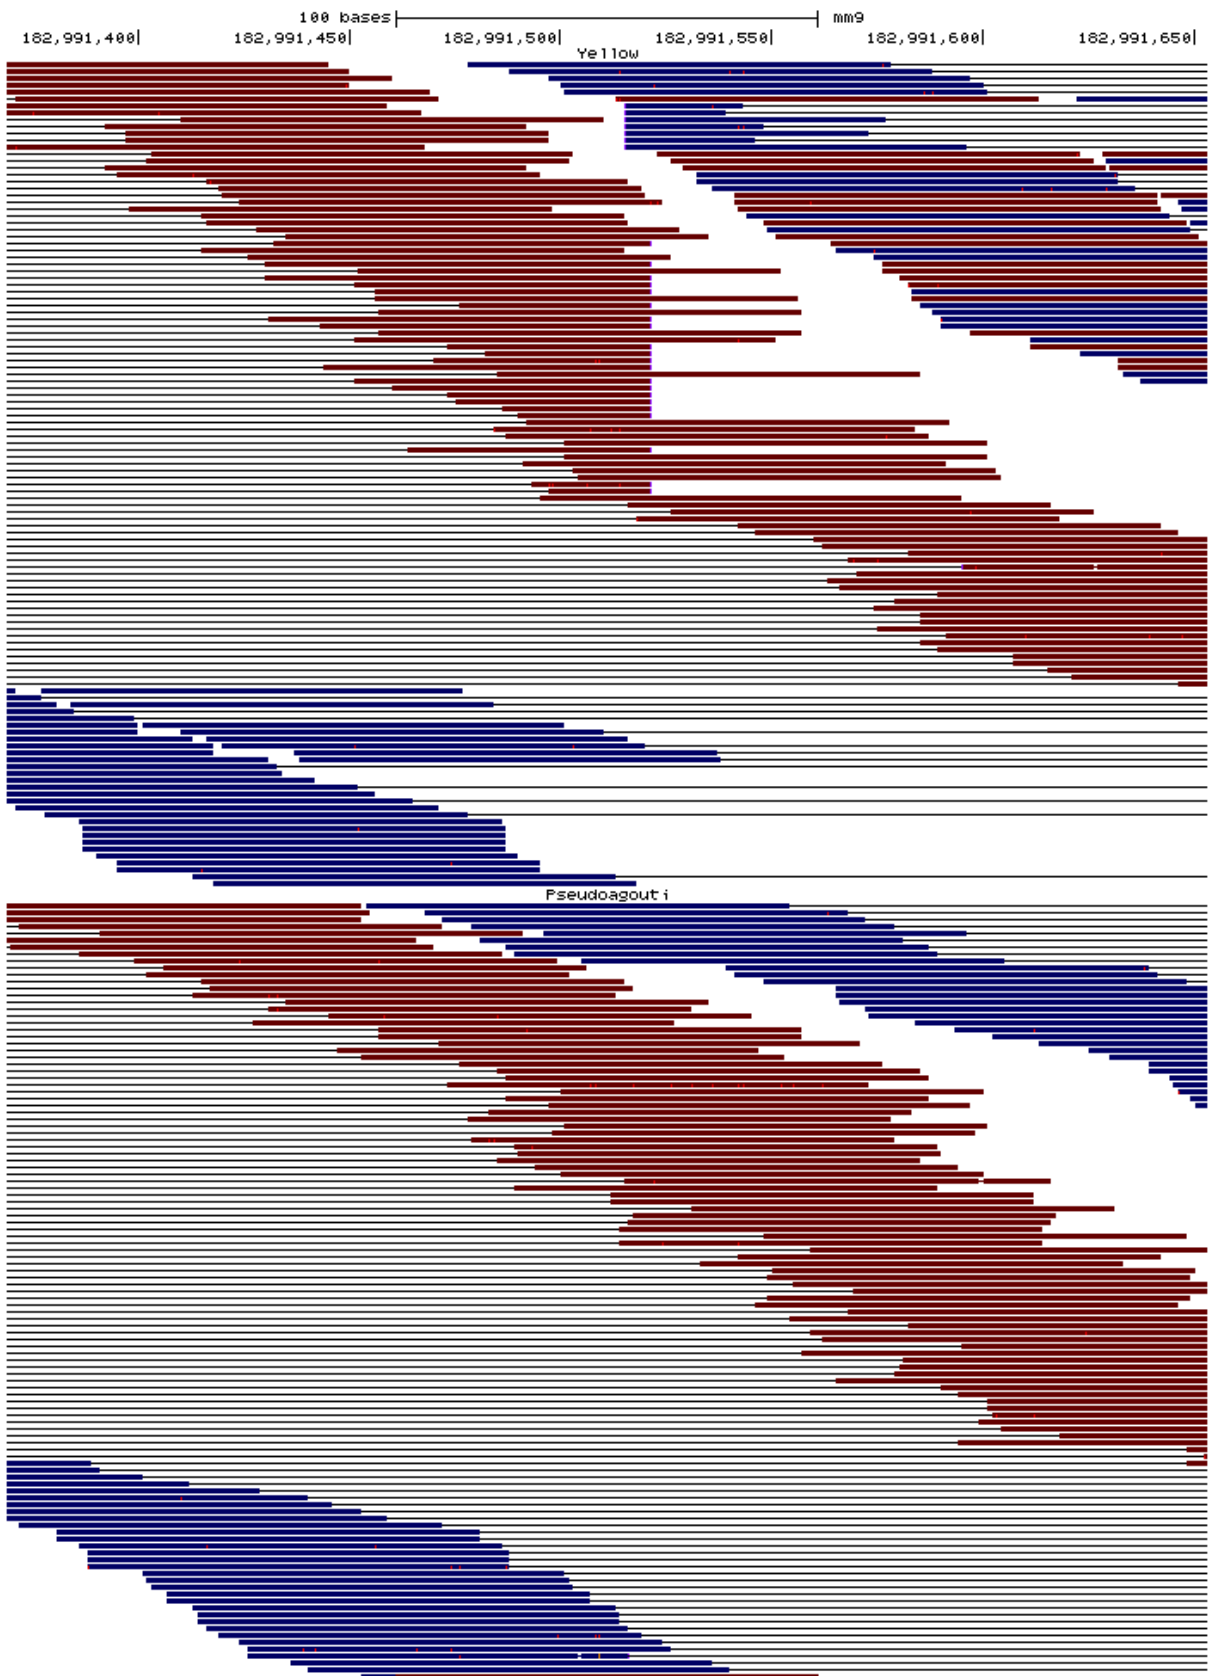

chr1:182,991,423-182,991,654

- MT2 insertion
- Yellow mouse heterozygous, pseudoagouti mouse wildtype

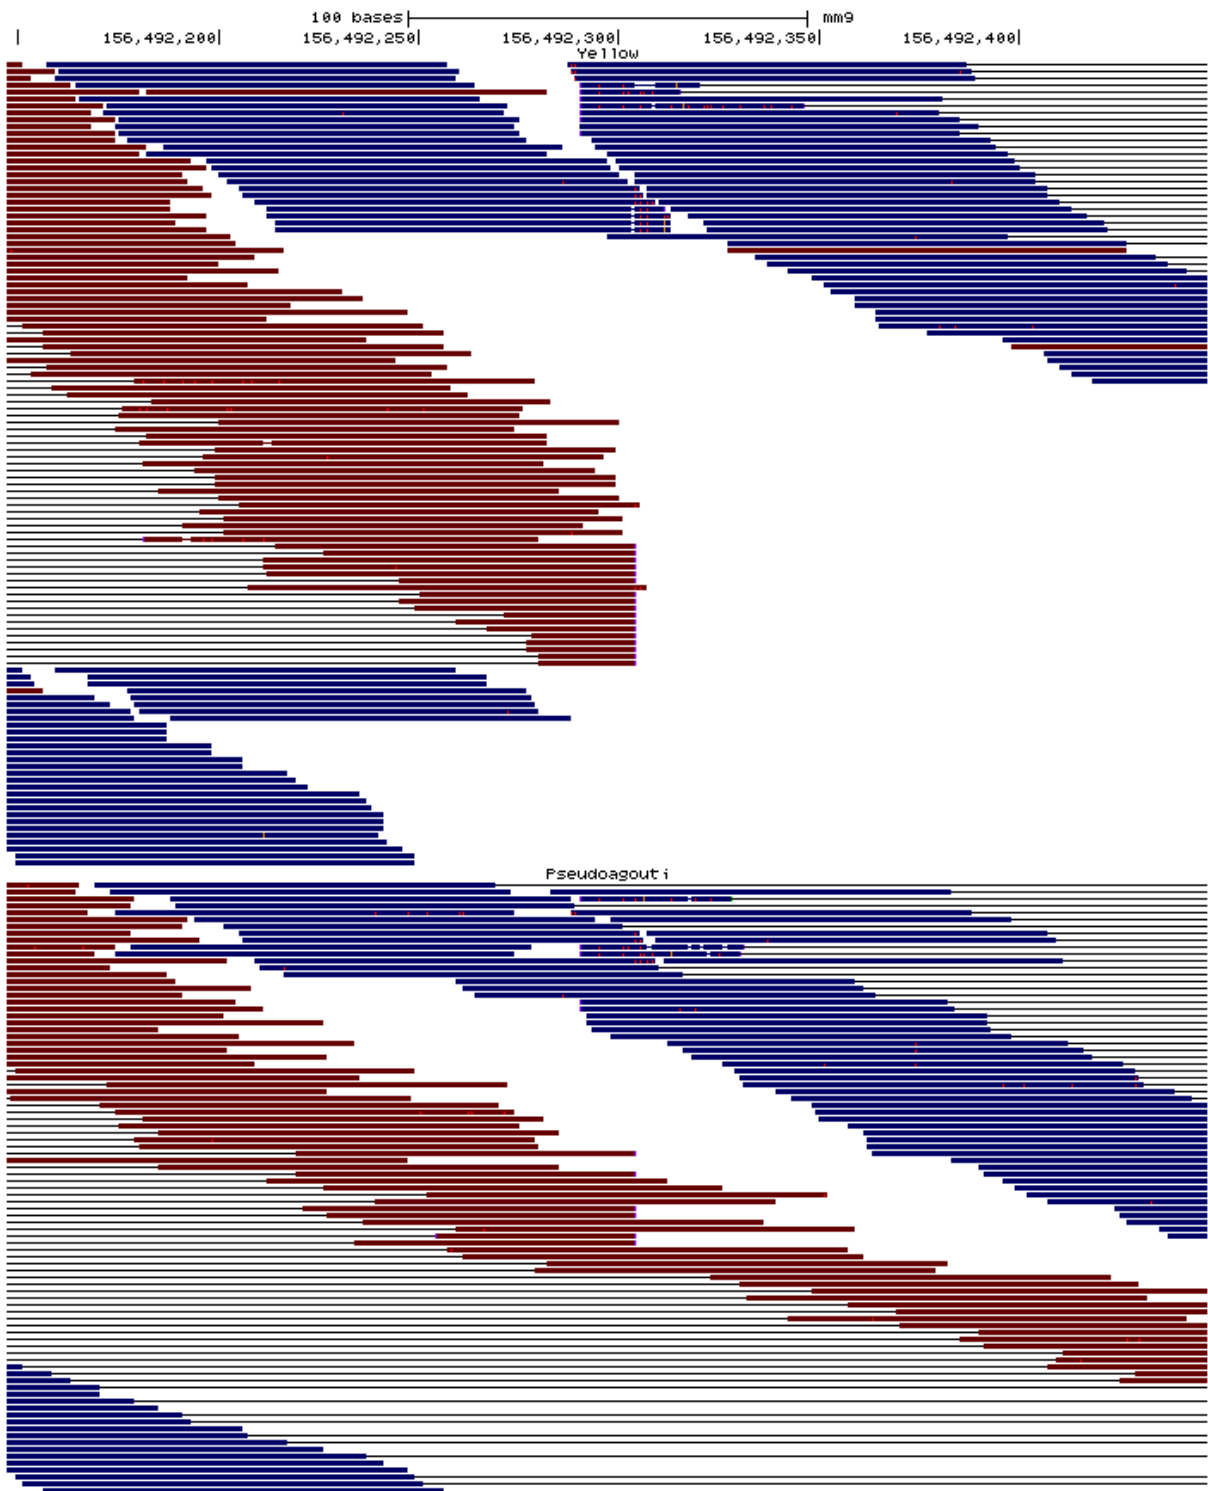

chr3:156,492,148-156,492,447

- L1 insertion
- Yellow mouse homozygous, pseudoagouti mouse heterozygous

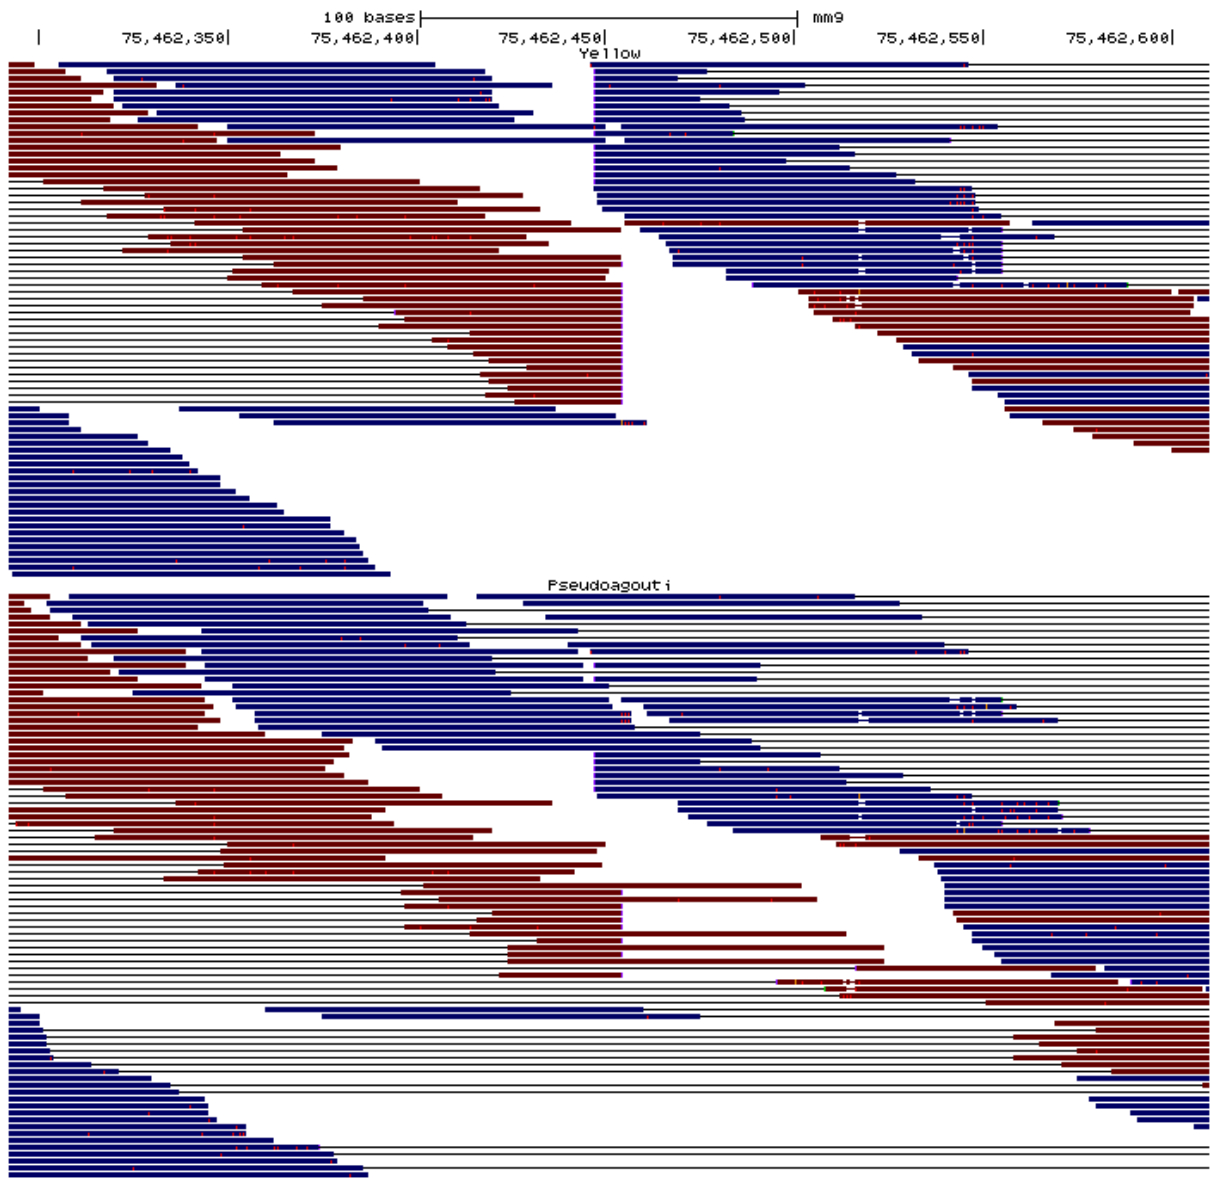

chr5:75,462,293-75,462,610

- MTA insertion
- Yellow mouse homozygous, pseudoagouti mouse heterozygous

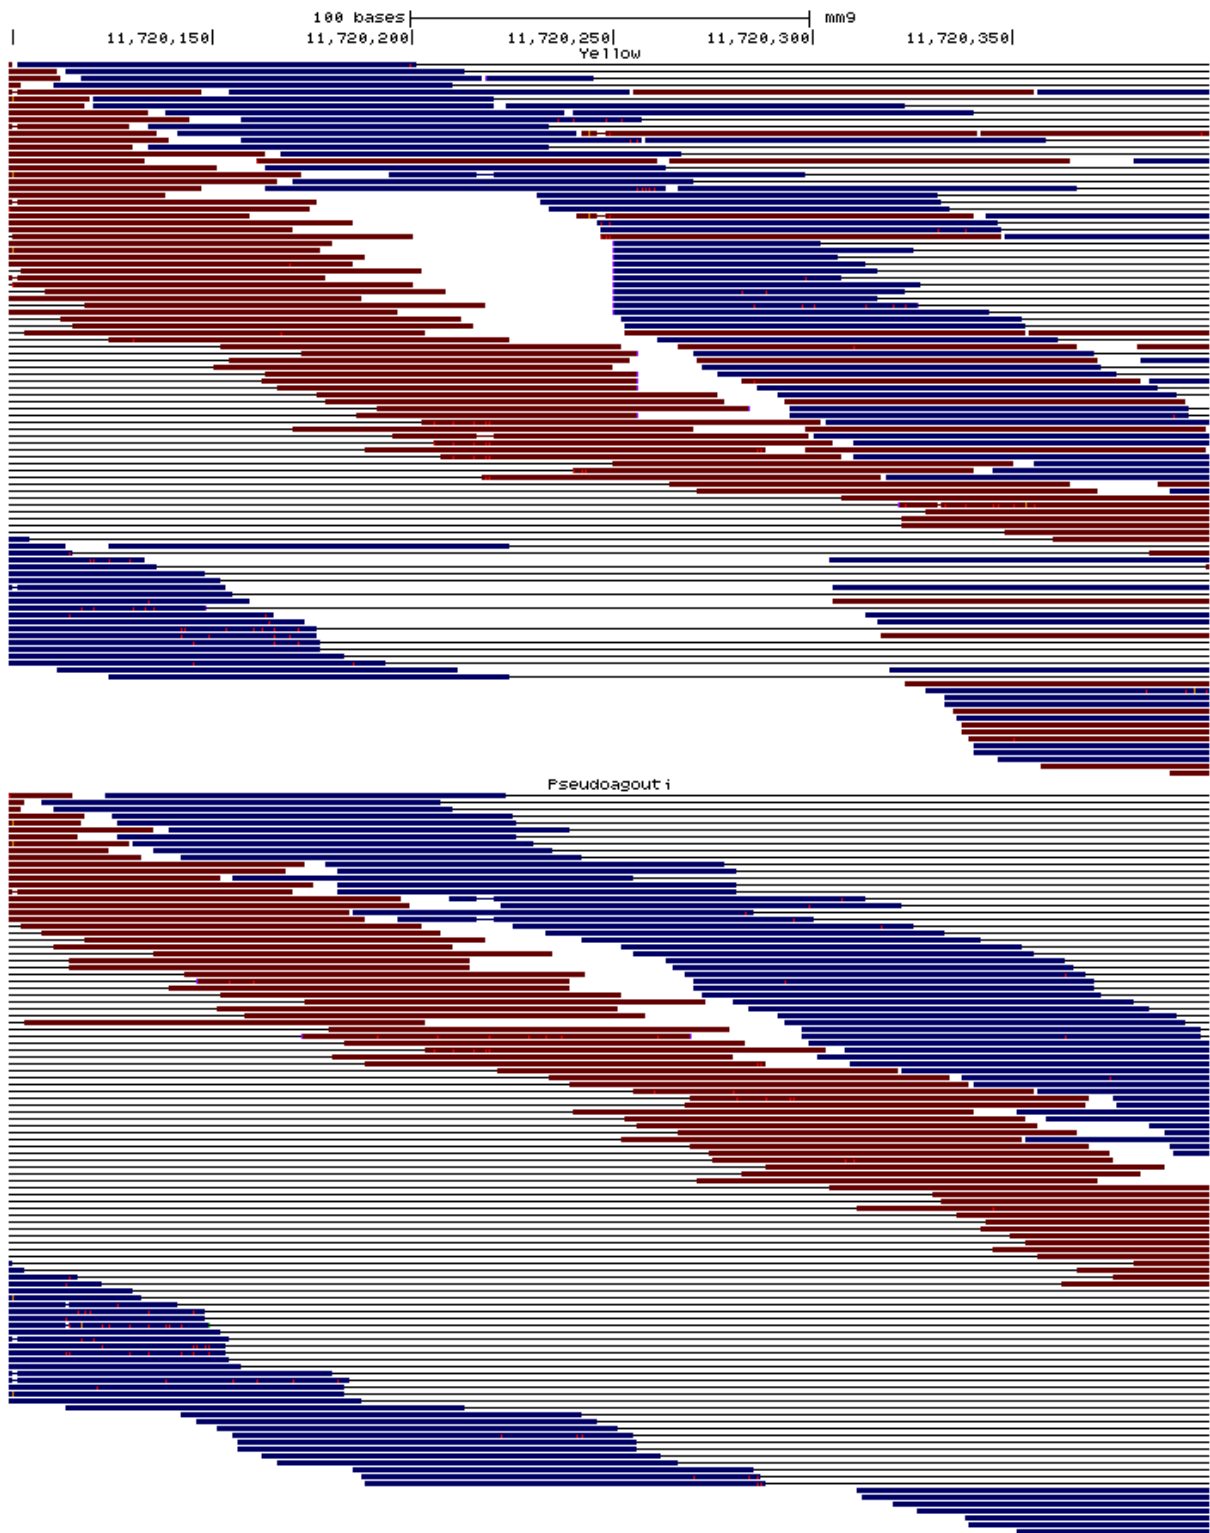

chr6:11,720,100-11,720,399

- MTA insertion
- Yellow mouse heterozygous, pseudoagouti mouse wildtype

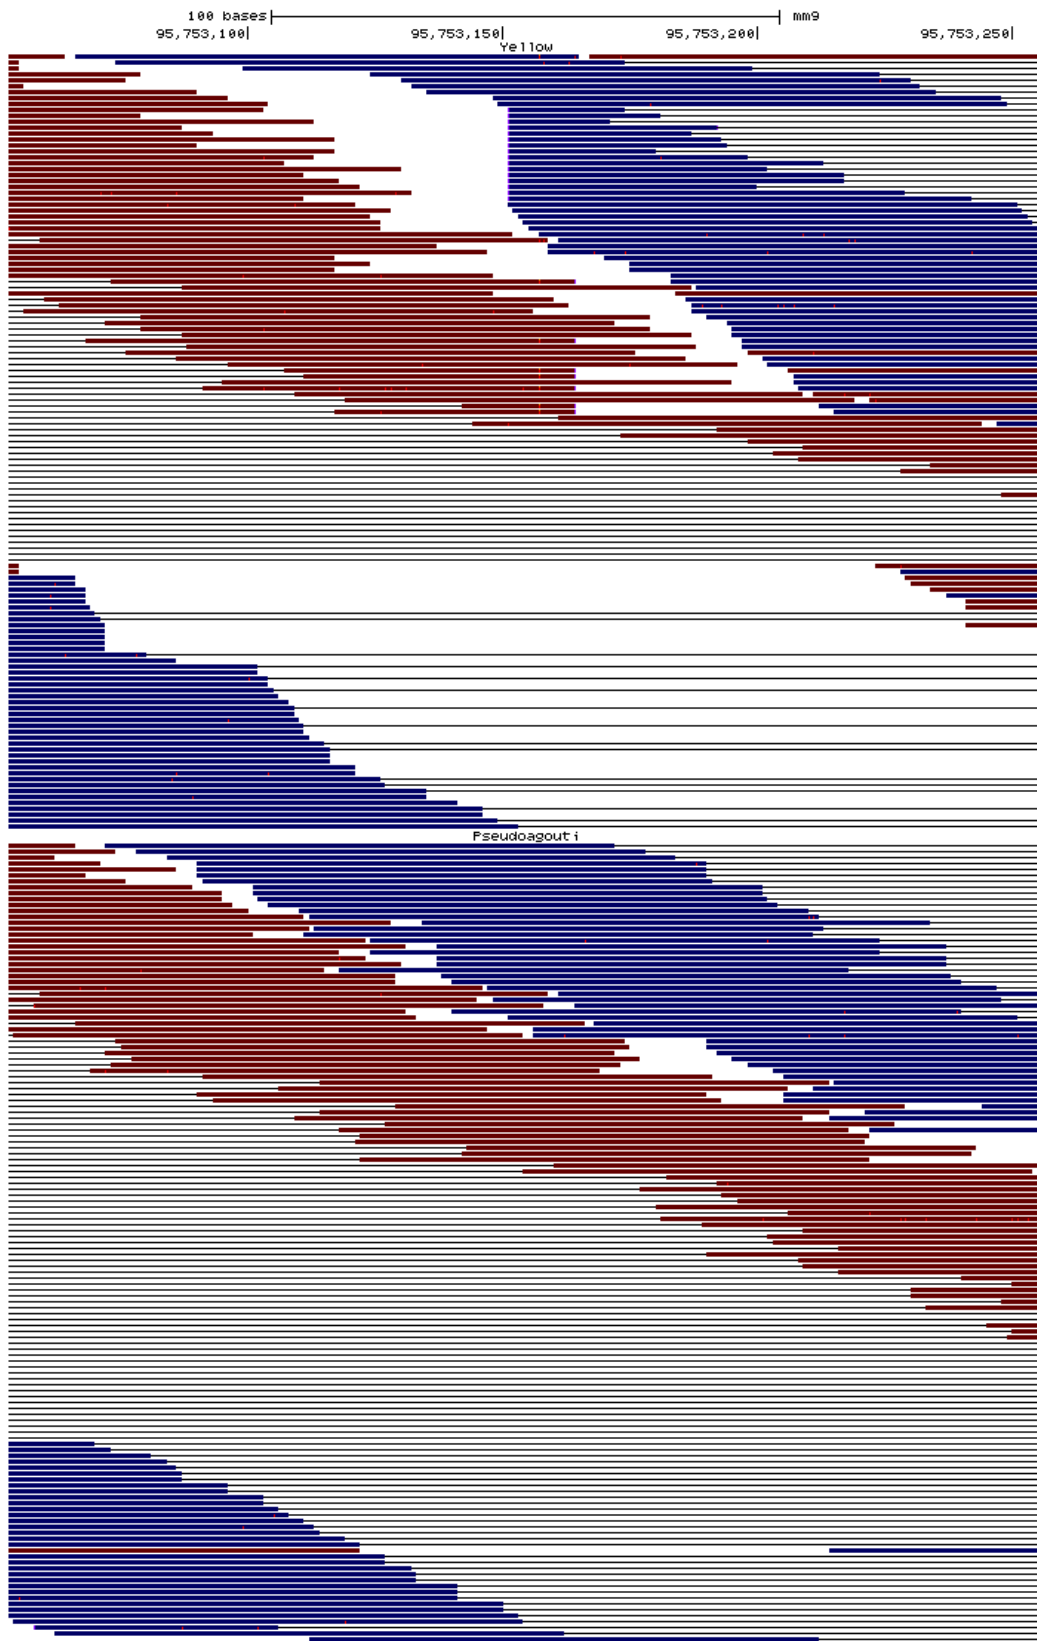

chr9:95,753,054-95,753,256

- MTA insertion
- Yellow mouse heterozygous, pseudoagouti mouse wildtype

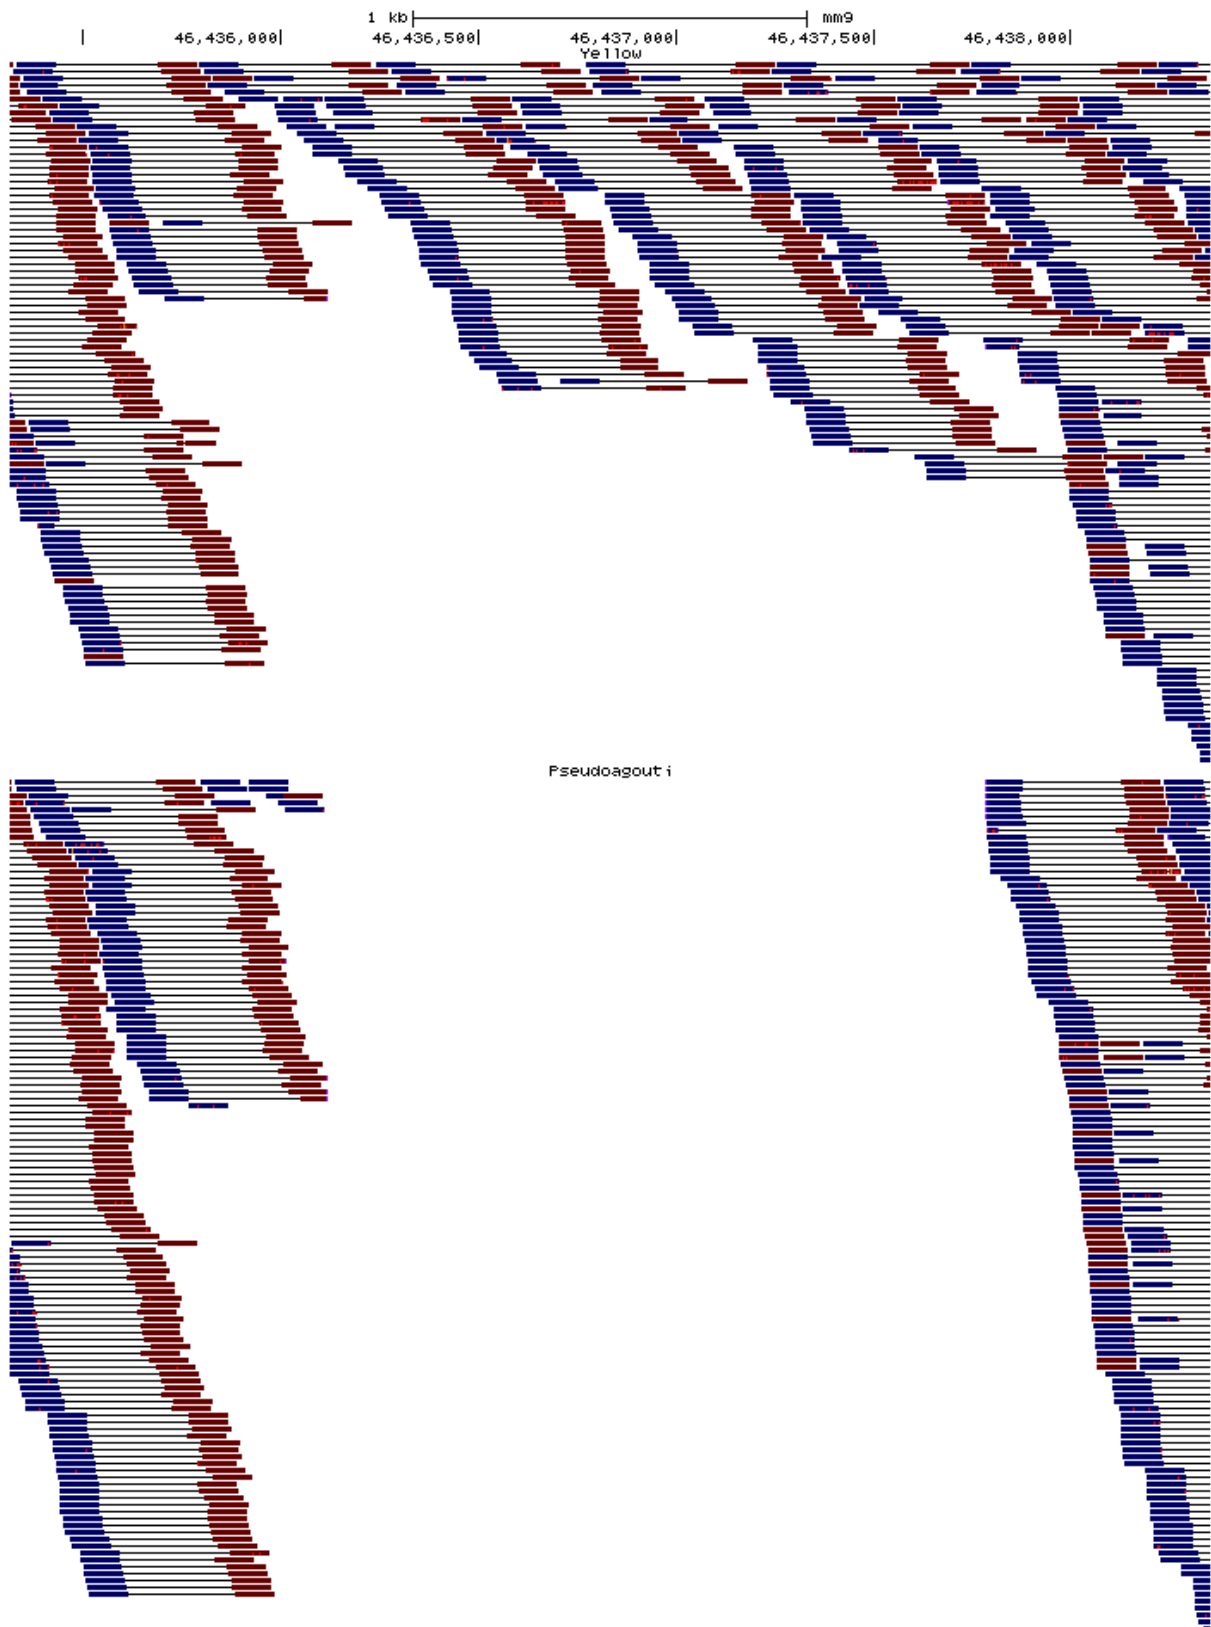

chr10:46,435,316-46,438,353

- L1 insertion combined with a small deletion
- Yellow mouse heterozygous, pseudoagouti mouse homozygous



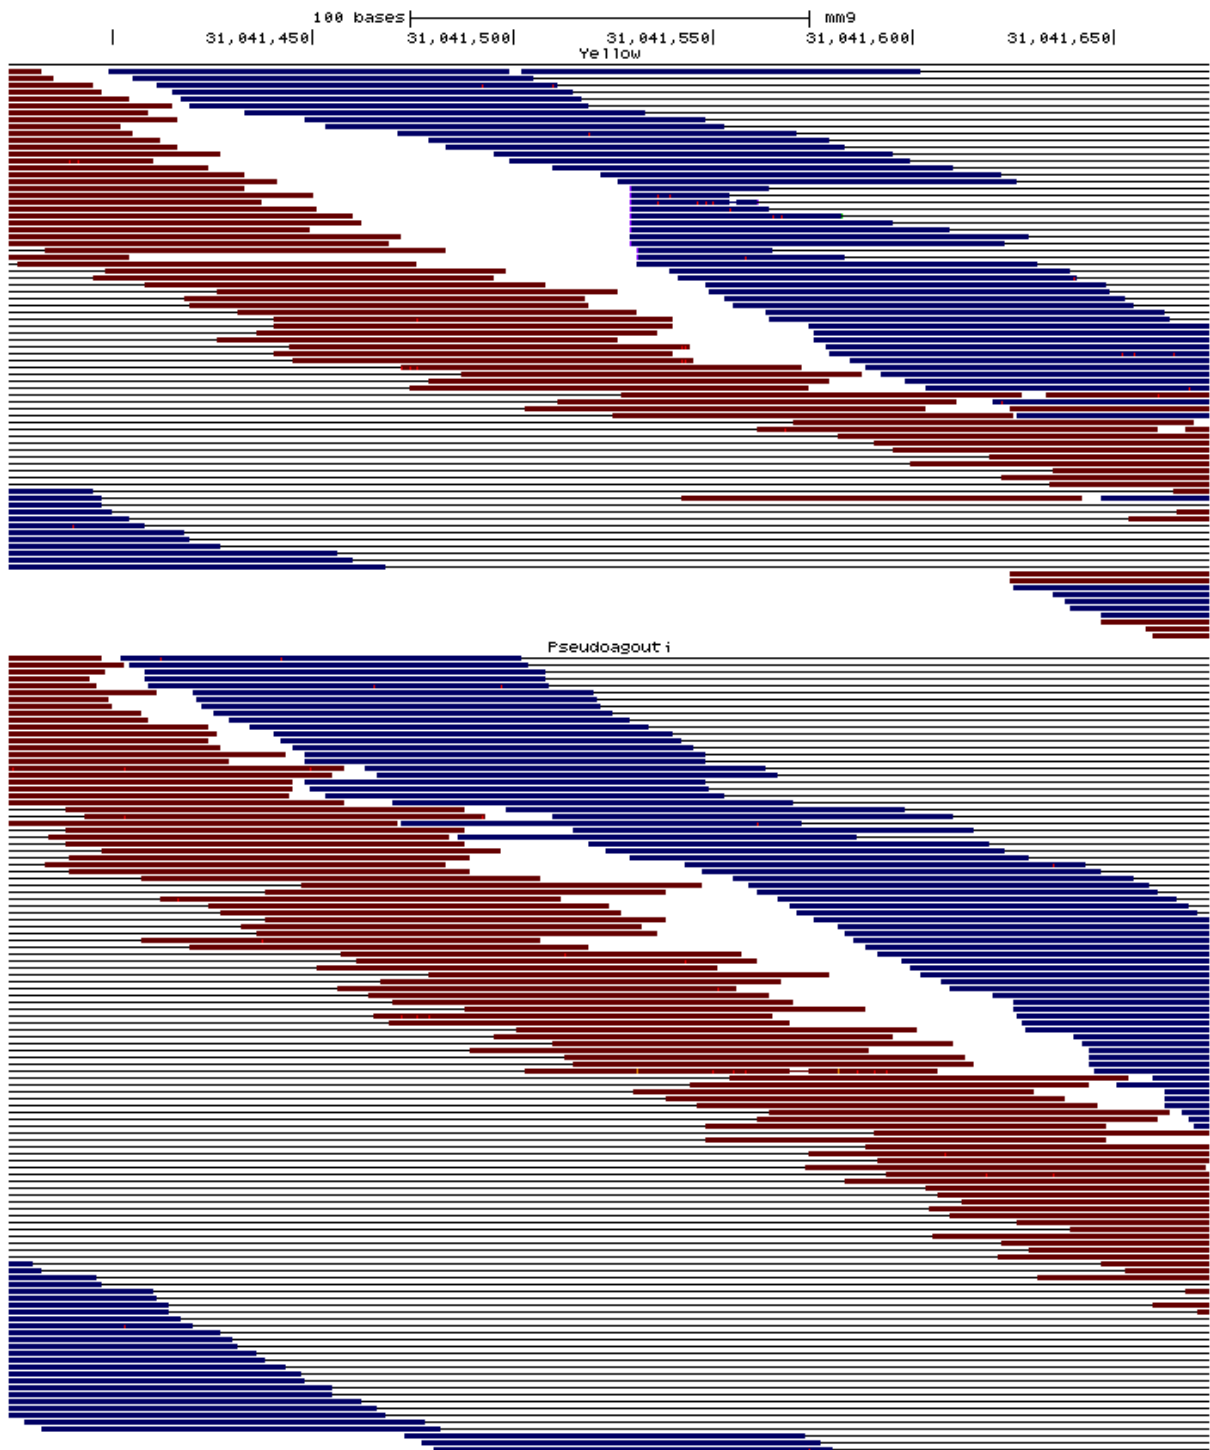

chr11:31,041,375-31,041,674

- L1 insertion
- Yellow mouse heterozygous, pseudoagouti mouse wildtype

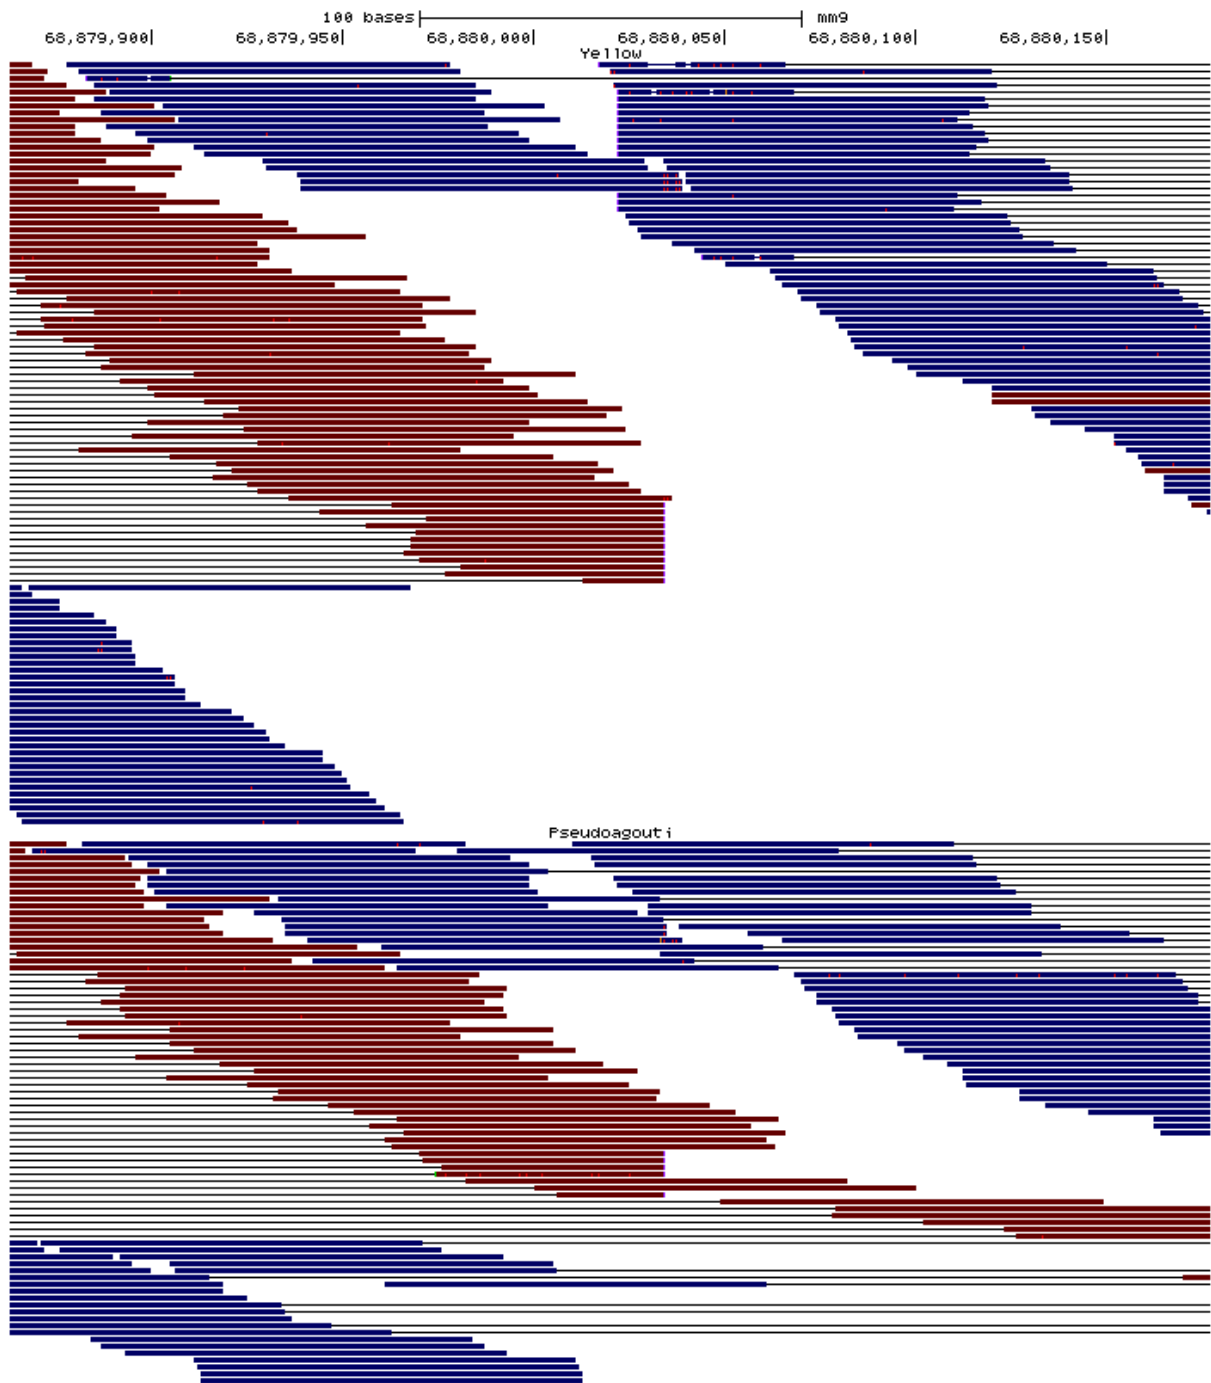

chr16:68,879,864-68,880,177

- L1 insertion
- Yellow mouse homozygous, pseudoagouti mouse heterozygous
