# Supplementary material for: Genetic and epigenetic variation among inbred mouse littermates: identification of inter-individual differentially methylated regions
Source: PubMed Central journal article supplement (PMC4676890; doi:10.1186/s13072-015-0047-z), 2015-12-12
Supplement: 13072_2015_47_MOESM4_ESM.pdf [file 13072_2015_47_MOESM4_ESM.pdf]

Differentially  
methylated sites

Differentially methylated regions (n=356)

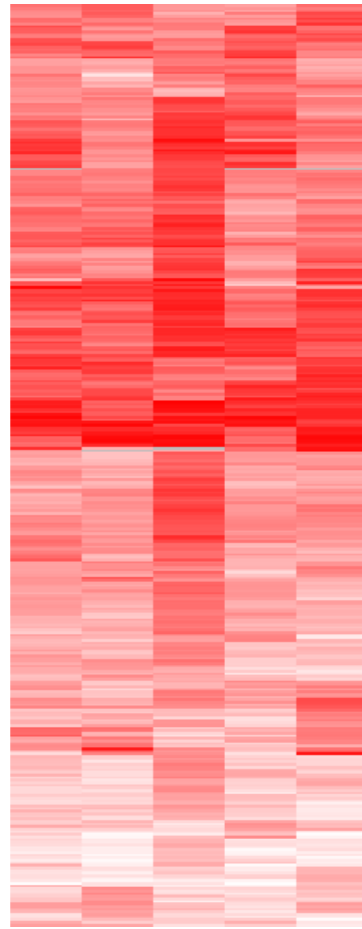

Yellow

Pseudoagouti

C57.1

C57.2

C57.3

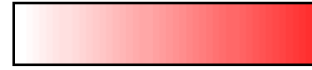

0

100

% mCG
