# Supplementary material for: Genetic and epigenetic variation among inbred mouse littermates: identification of inter-individual differentially methylated regions
Source: PubMed Central journal article supplement (PMC4676890; doi:10.1186/s13072-015-0047-z), 2015-12-12

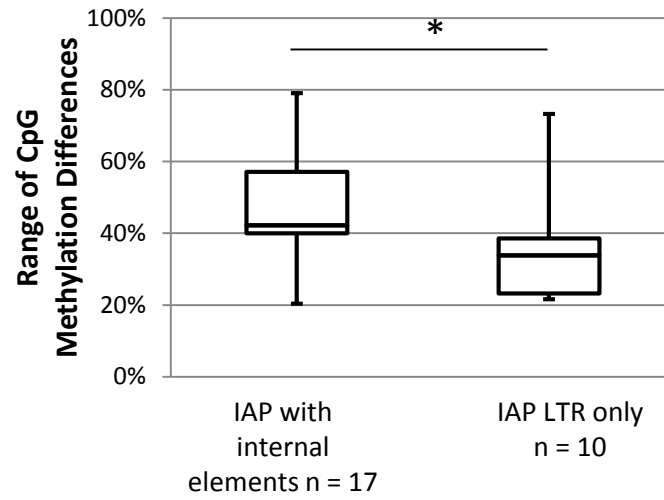

Supplement: 13072_2015_47_MOESM5_ESM.pdf [file 13072_2015_47_MOESM5_ESM.pdf]
